# Supplementary material
Source: Springer Nature journal article supplement (https://www.springermedizin.de/resource/supplementary/12913_2013_3069_MOESM3_ESM.pdf/9532340)

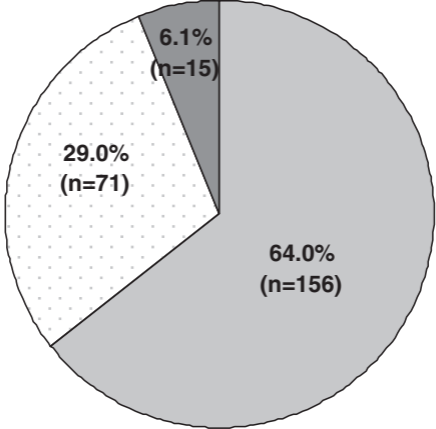

■ 30 minutes □ 31-60 minutes ■ more than 60 minutes

Supplement: MOESM3 [file 9532340]
